# Supplementary material for: Challenges Facing Home-Based Caregivers in the Management of Health Care Risk Waste
Source: PubMed Central journal article supplement (PMC6313601; doi:10.3390/ijerph15122700), 2018-11-30
Supplement: ijerph-15-02700-s001.pdf [file ijerph-15-02700-s001.pdf]

|                       |  |  |  |
|-----------------------|--|--|--|
| Nappies               |  |  |  |
| Pads                  |  |  |  |
| Needles               |  |  |  |
| Syringes              |  |  |  |
| Toilet paper          |  |  |  |
| Medication containers |  |  |  |
| Expired medication    |  |  |  |
| Other                 |  |  |  |

List other: \_\_\_\_\_

**Amount of health risk waste you generate in a day**

Half a bag    1 full bag    2 full bags    3 full bags    4 full bags    5 full bags

                  

**What do you do with the generated health care risk waste?**

Leave it in the homestead    Flush the waste    Burn the waste

      

Throw it away    Take it with you to the clinic    Take it home with you

      

**Storage containers of waste**

Plastic bags    Waste storage containers    Both

      

**Health care risk waste training**

Have you been trained on health care risk waste?    Yes    No

Do you want training on health care risk waste?

Yes

No

**PROTECTIVE CLOTHING**

Do you wear gloves when you are working?

Yes

No

Do you wear mouth masks when you are working?

Yes

No

Do you wear aprons when you are working?

Yes

No

Do you sanitise your hands after each visit?

Yes

No

Have you been injured when you are working?

Yes

No

**WORKING CONDITIONS**

Are you provided counseling?

Yes

No

If yes, are the counseling sessions sufficient?

Yes

No

THANK YOU
